# Supplementary material
Source: PubMed Central journal article supplement (PMC3071057)

### Sample Distribution

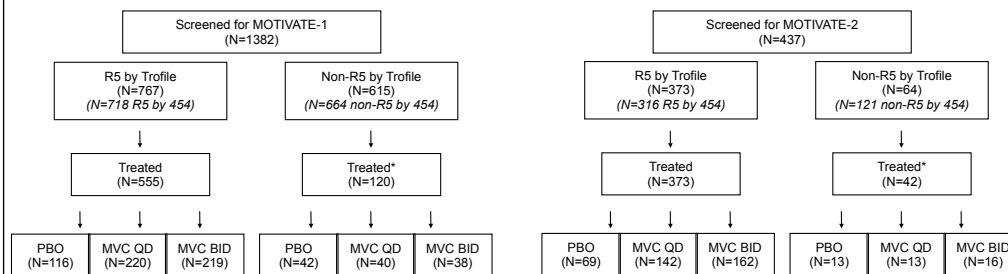

\* Treated in A4001029 trial

NB: 8 patients screened for A4001029 directly

Supplement: supp_jiq030_SupplementaryFigure-Sample_Distributions.pdf [file supp_jiq030_SupplementaryFigure-Sample_Distributions.pdf]
